# Supplementary material for: Supplementation with Oral Vitamin C Prior to and during Myeloablative Chemotherapy and Autologous Haematopoietic Stem Cell Transplantation: A Pilot Study
Source: MDPI journal article supplement (doi:10.3390/antiox11101949), 2022-09-29
Supplement: s1 [file s1]

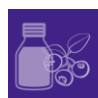

Supplemental material

## Supplementation with Oral Vitamin C Prior to and During Myeloablative Chemotherapy and Autologous Haematopoietic Stem Cell Transplantation: a Pilot Study

Anitra C. Carr <sup>1,\*</sup>, Emma Vlasiuk <sup>1</sup>, Masuma Zawari <sup>1</sup>, Natalie Meijer <sup>2</sup>, Carolyn Lauren <sup>2</sup>, Sean MacPherson <sup>2</sup>, Jonathan Williman <sup>3</sup> and Stephen Chambers <sup>4</sup>

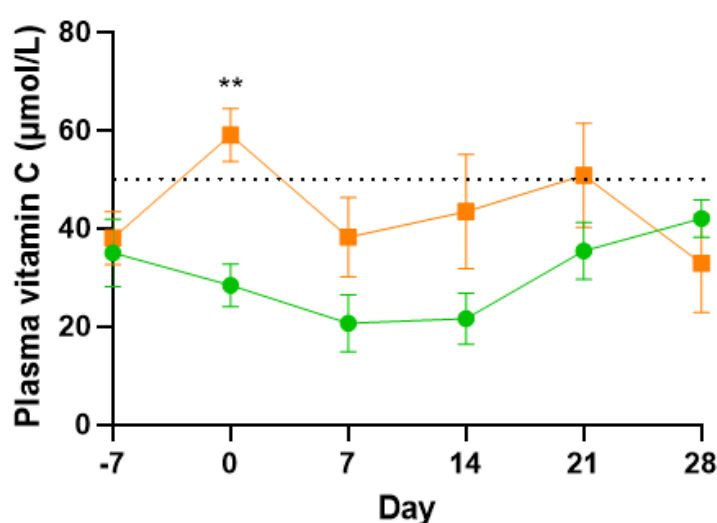

**Figure S1.** Effect of oral supplementation on vitamin C status of participants. Placebo group, green symbols; vitamin C group, orange symbols. Dashed line indicates 50 μmol/L vitamin C. Data indicate mean and SEM. Mixed-effects analysis indicated a significant difference between the two groups; \*\*  $p = 0.002$  by post-hoc analysis.
